# Supplementary material
Source: PubMed Central journal article supplement (PMC2095695)
Supplement: gut_2006.113431_2.pdf [file gut_2006.113431_2.pdf]

**Table 4.** Reported diagnostic accuracy of fecal calprotectin in the differentiation of IBD versus IBS.

|                       | <b>Sensitivity</b> | <b>Specificity</b> | <b>Patients (n, age)</b> |
|-----------------------|--------------------|--------------------|--------------------------|
| <b>Tibble 2000</b>    | <b>82</b>          | <b>83</b>          | <b>220, adults</b>       |
| <b>Tibble 2002</b>    | <b>89</b>          | <b>79</b>          | <b>602, adults</b>       |
| <b>Limburg 2000</b>   | <b>83</b>          | <b>83</b>          | <b>110, adults</b>       |
| <b>Carroccio 2003</b> | <b>63</b>          | <b>80</b>          | <b>70, adults</b>        |
| <b>Carroccio 2003</b> | <b>69</b>          | <b>93</b>          | <b>50, children</b>      |
| <b>Dolwani 2004</b>   | <b>100</b>         | <b>79</b>          | <b>49, adults</b>        |
| <b>Fagerberg 2005</b> | <b>95</b>          | <b>93</b>          | <b>36, children</b>      |
| <b>Present study</b>  | <b>63</b>          | <b>86</b>          | <b>83, adults</b>        |
